# Supplementary material for: High frequency of CHD7 mutations in congenital hypogonadotropic hypogonadism
Source: PubMed Central journal article supplement (PMC6367338; doi:10.1038/s41598-018-38178-y), 2019-02-07
Supplement: 41598_2018_38178_MOESM1_ESM.pdf [file 41598_2018_38178_MOESM1_ESM.pdf]

## High frequency of CHD7 mutations in congenital hypogonadotropic hypogonadism

Catarina Inês Gonçalves, Filipa Marina Patriarca, José Maria Aragüés, Davide Carvalho, Fernando Fonseca, Sofia Martins, Olinda Marques, Bernardo Dias Pereira, José Martinez-de-Oliveira, Manuel Carlos Lemos.

**Supplemental Table S1.** Evolutionary conservation of CHD7 mutated amino acids (bold) across different species.

| Species               | G388E |                              | H903P |                              | T1082I |                                |
|-----------------------|-------|------------------------------|-------|------------------------------|--------|--------------------------------|
|                       | Codon | Alignment                    | Codon | Alignment                    | Codon  | Alignment                      |
| Human                 | 388   | P S Q P Q <b>G</b> T Y A S P | 903   | G E P V T <b>H</b> Y L V K W | 1082   | F H A I I <b>I</b> T T F E M I |
| Mutated variant       | 388   | P S Q P Q <b>E</b> T Y A S P | 903   | G E P V T <b>P</b> Y L V K W | 1082   | F H A I I <b>I</b> T T F E M I |
| <i>P.troglodytes</i>  | 388   | P S Q P Q <b>E</b> T Y A S P | 903   | V T <b>H</b> Y L V K W       | 1082   | I <b>T</b> T F E M I           |
| <i>M.mulatta</i>      | 388   | P S Q P Q <b>E</b> T Y A S P | 903   | V T <b>H</b> Y L V K W       | 1082   | I <b>T</b> T F E M I           |
| <i>F.catus</i>        |       |                              |       |                              |        |                                |
| <i>M.musculus</i>     | 382   | P S Q P Q <b>E</b> T Y A S P | 893   | P V I <b>H</b> Y L V K W     | 1072   | I I <b>I</b> T T F E M I       |
| <i>G.gallus</i>       |       |                              | 141   | P V T <b>H</b> Y L V K W     | 320    | F H A I I <b>I</b> T T F E M I |
| <i>T.rubripes</i>     |       |                              |       |                              |        |                                |
| <i>D.rerio</i>        | 402   | A Q P P Q <b>G</b> S Y S S P | 947   | G E L V T <b>L</b> Y L V K W | 1126   | F H A V I <b>I</b> T T F E M I |
| <i>D.melanogaster</i> |       |                              | 1962  | G E T T K <b>H</b> Y L V K W | 2143   | F N V L I <b>I</b> T T F E M I |
| <i>C.elegans</i>      | 544   | P H Q H Q <b>Q</b> P A S V P | 1135  | G Q E F V - - L I K W        | 1311   | I D A L I <b>I</b> T T F E T V |
| <i>X.tropicalis</i>   | 323   | P S Q P Q <b>G</b> T Y A S P | 830   | G E P V C <b>H</b> Y L V K W | 1009   | F H A I I <b>I</b> T T F E M I |

  

| Species               | V1452L |                              | D1854G |                              | R2065H |                              |
|-----------------------|--------|------------------------------|--------|------------------------------|--------|------------------------------|
|                       | Codon  | Alignment                    | Codon  | Alignment                    | Codon  | Alignment                    |
| Human                 | 1452   | N A T N G <b>V</b> Q Q L S K | 1854   | D R E D E <b>D</b> P E Y K P | 2065   | L L R K I <b>R</b> E Q V L H |
| Mutated variant       | 1452   | N A T N G <b>L</b> Q Q L S K | 1854   | D R E D E <b>G</b> P E Y K P | 2065   | L L R K I <b>H</b> E Q V L H |
| <i>P.troglodytes</i>  | 1452   | N A T N G <b>V</b> Q Q L S K | 1854   | D R E D E <b>D</b> P E Y K P | 2065   | L L R K I <b>R</b> E Q V L H |
| <i>M.mulatta</i>      | 1452   | N A T N G <b>V</b> Q Q L S K | 1856   | D R E D E <b>D</b> P E       | 2067   | L L R K I <b>R</b> E Q V L H |
| <i>F.catus</i>        |        |                              |        |                              |        |                              |
| <i>M.musculus</i>     | 1442   | N A T N G <b>V</b> Q Q L S K | 1844   | D R E D E <b>D</b> P E Y K P | 2055   | L L R K I <b>R</b> E Q V L H |
| <i>G.gallus</i>       | 690    | N A T N G <b>V</b> Q Q L S K | 1092   | D R E D E <b>D</b> P E Y K P | 1302   | L L R K I <b>R</b> E Q V L H |
| <i>T.rubripes</i>     |        |                              |        |                              |        |                              |
| <i>D.rerio</i>        | 1504   | N A A N G <b>V</b> Q Q L S K | 1906   | E E E <b>D</b> P E Y K P     | 2149   | L L R R I <b>R</b> E Q V L P |
| <i>D.melanogaster</i> | 2512   | S K D G N <b>V</b> K Q L S K | 2991   | K H D D G <b>D</b> E V D D D |        |                              |
| <i>C.elegans</i>      | 1683   | A E G T A - - - L S K        |        |                              |        |                              |
| <i>X.tropicalis</i>   | 1382   | N A T N G <b>V</b> Q Q L S K | 1784   | E <b>D</b> P E Y K P         | 1993   | L L R K I <b>R</b> E Q V L N |
